# Supplementary material
Source: publisher site journal article supplement (https://www.dovepress.com/article/371719)
Supplement: Supplementary file 1 [file get_supplementary_file.php]

**Table S1. The clinical information of samples**

| **Number** | **Sample** | **Normal** | **Psoriasis** | **Gender** | **Age (year)** | **Family history** | **Medical history**  **(year)** | **PASI** | **Group** |
| --- | --- | --- | --- | --- | --- | --- | --- | --- | --- |
| TW01 | Blood | N01 | P01 | Male | 24 | none | 5 | 14.2 | Heavy |
| TW02 | Blood | N02 | P02 | Female | 20 | none | 3.5 | 13.1 | Heavy |
| TW05 | Blood | N05 | P05 | Female | 51 | none | >10 | 5.1 | Light |
| TW06 | Blood | N06 | P06 | Male | 11 | none | 6.5 | 4.5 | Heavy |
| TW08 | Blood | N08 | P08 | Female | 29 | none | 9 | 4.5 | Light |
| TW09 | Blood | N09 | P09 | Male 25 | | elder sister | 4.5 | 2.9 | Light |
| TW13 | Blood | N13 | P13 | Female | 40 | elder sister | >30 | 4.7 | Light |
| TW14 | Blood | N14 | P14 | Female | 40 | grandfather, aunt | >10 | 5.8 | Heavy |
| TW16 | Blood | N16 | P16 | Male | 51 | none | >10 | 8.4 | Heavy |
| TW02 | Tissue |  | PL02, NS02 | Female | 20 | none | 3.5 | 13.1 | Heavy |
| TW13 | Tissue |  | PL13, NS13 | Female | 40 | elder sister | >30 | 4.7 | Light |
| TW14 | Tissue |  | PL14, NS14 | Female | 40 | grandfather, aunt | >10 | 5.8 | Heavy |

**Table S2 Clinicopathological features of this patient cohort**

| Variable | Subtype | n | % |
| --- | --- | --- | --- |
| Gender | Male | 136 | 48.2 |
| Female | 146 | 51.8 |
| Age | ≤40 | 162 | 57.4 |
| ＞40 | 120 | 42.6 |
| Medical history | ≤20 | 164 | 58.2 |
| ＞20 | 118 | 41.8 |
| PASI | ≤10 | 209 | 74.1 |
| ＞10 | 73 | 25.9 |
| Family history | Yes | 77 | 27.3 |
| No | 139 | 49.3 |

**Table S3 Primer sequences used to amplify the 13 mutant genes**

| Gene | [Primer](javascript:void(0);) sequences-F | [Primer](javascript:void(0);) sequences-R |
| --- | --- | --- |
| MEGF6 | ACTCACCTTGGCCACAGTC | TGTCAGGCAGGTGAGTCC |
| CADM2 | TGTAAGCATGTGATTCTCCCTG | GGCAGAATCCCATCAGTAAGTG |
| MEGF11 | GAATGGTGGGCGTAGGTCCTAG | TAGCTGAGTGTAATGATGCACG |
| JPH2 | TTCAAGCCCATCCTCAG | GCAGAAATCCAGCCAAC |
| NCAM2 | CTGCGTACCAGTGGAATC | CTAAGTTATGAGGGCAAA |
| PRKCE | TACCTTCCTCATTCCCACAT | ATCGCTCATCCAGGCTTT |
| DPP6 | TGTAAAGTGTCAGACGGATAA | GCCTGGGCAACATAGAG |
| FANCC | GGGTAACAAAGGGAGAC | ACTAACAAGCCACGATT |
| RRAP3 | TCCAACCCTGCTATGCT | GTTTGCCATCTGCTTCA |
| MYH14 | CTAAGGCGGGTGAGTTT | CTCCCAGTGAACAAATAGC |
| SPTLC3 | ACATAGTAGTTCTCCAGGGTG | CATTATGCTTTGGGTGG |
| DENND5B | AGCGGAGATGGCATCAAAATC | GCTCAAGCGATCTTTCTATCCT |
| KLC1 | TAGTTTAAAGCATCCACCTA | TTTAGATATGTTTAGTTGCACAA |
